# Supplementary figures and images for: Identification of Multiple Replication Stages and Origins in the Nucleopolyhedrovirus of Anticarsia gemmatalis
Source: MDPI journal article supplement (doi:10.3390/v11070648), 2019-07-15

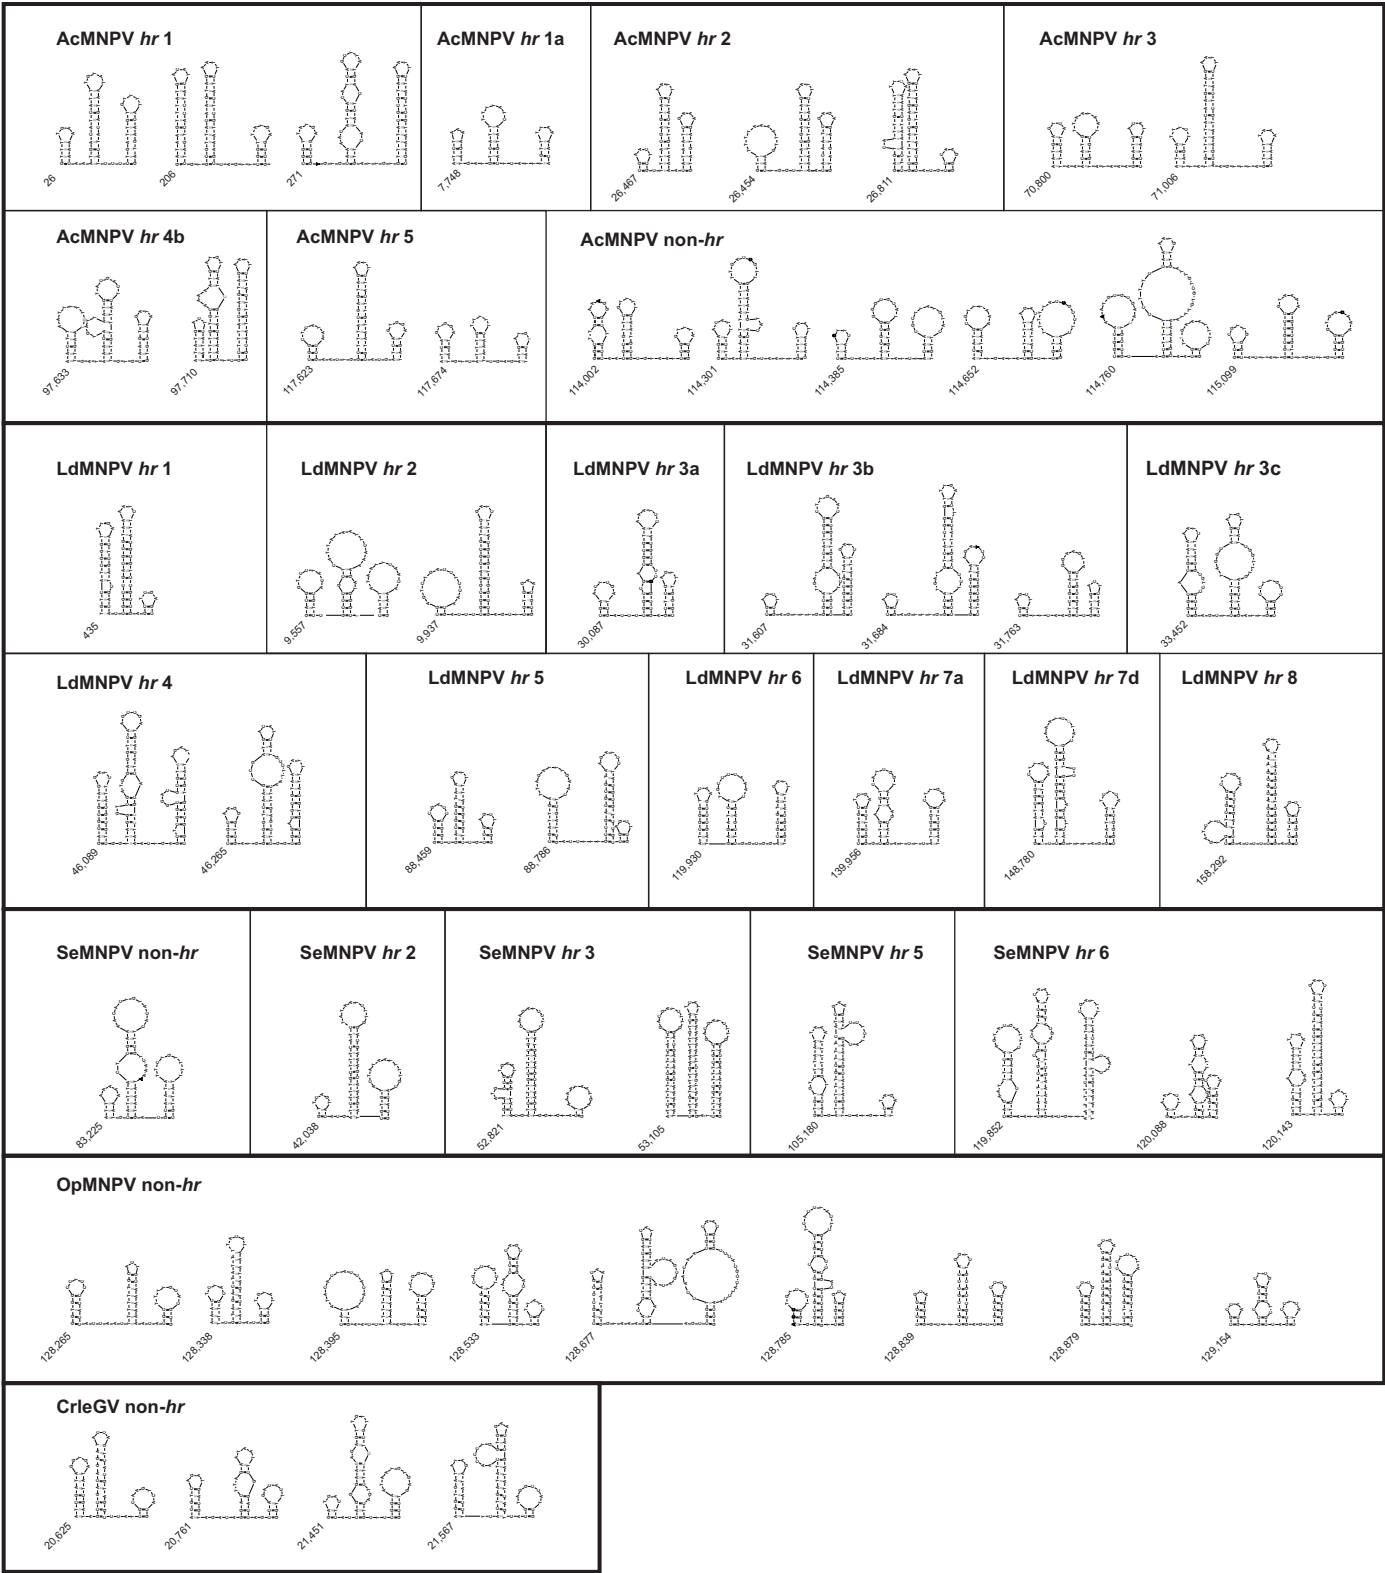

Supplement: s1 [file s1]

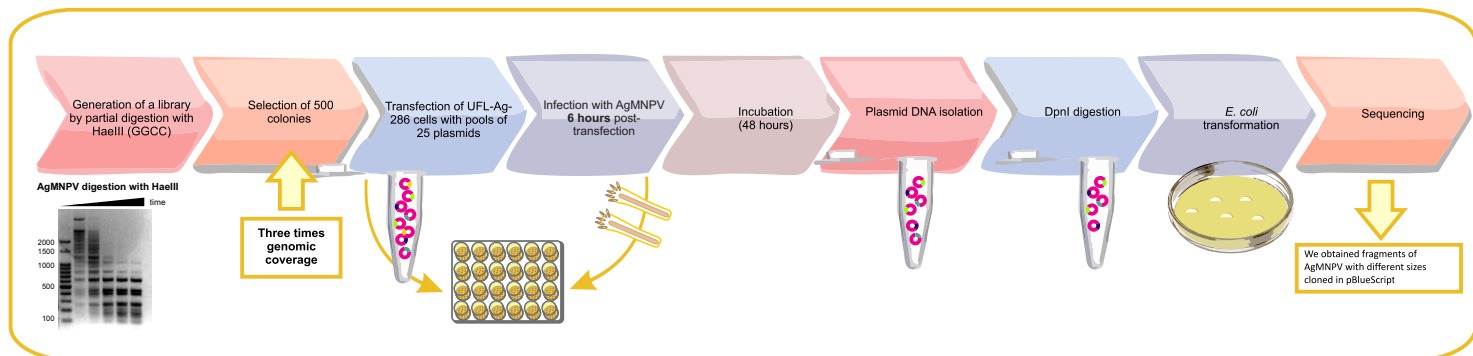

Supplement: s1 [file s1]
